# Supplementary material
Source: publisher figshare collection journal article supplement (https://plos.figshare.com/articles/dataset/_/2731663)
Supplement: Supplementary file [file 1]

Boxes represent the vertebrae in the column, including the atlas. Filled boxes indicate presence of the lamina in the respective vertebrae, whereas a dash stands for absence. Only the seven specimens with articulated vertebral column could be assessed.

| Species                  | Specimen | Cervical Vertebrae                                                                 | Dorsal Vertebrae                                                                    |
|--------------------------|----------|------------------------------------------------------------------------------------|-------------------------------------------------------------------------------------|
| <i>Lacerta agilis</i>    | MDHC 176 |  |  |
| <i>Lacerta agilis</i>    | MDHC 177 |  |  |
| <i>Lacerta agilis</i>    | MDHC 178 |  |  |
| <i>Lacerta bilineata</i> | MDHC 15  |  |  |
| <i>Lacerta bilineata</i> | MDHC 77  |  |  |
| <i>Zootoca vivipara</i>  | MDHC 179 |  |  |
| <i>Takydromus</i> sp.    | MDHC 151 |  |  |
